# Supplementary material
Source: publisher figshare collection journal article supplement (https://sage.figshare.com/ndownloader/files/14150450)
Supplement: Supplementary file 1 [file 14150450]

**Supplemental Material for**

**Stable preview difficulty effects in reading with an improved variant of the boundary paradigm**

Sarah Risse and Stefan Seelig

University of Potsdam, Germany

Table S1

Control analysis of orthographic overlap. *Linear mixed-effects models for a reduced set of fixation durations on the target word n+1 containing only the preview change conditions. As fixed effects, the preview difficulty contrast (c1[pvD]), the letter similarity (lsim: centered on zero) and their interaction were estimated. Significant estimates in bold. See text for more details.*

|  | FFD | | SFD | | GZD | | TVT | |
| --- | --- | --- | --- | --- | --- | --- | --- | --- |
|  | *bs* | *ts* | *bs* | *ts* | *bs* | *ts* | *bs* | *ts* |
| c1 [pvD] | .08 | **5.00** | .10 | **6.77** | .09 | **6.20** | .05 | **2.85** |
| lsim | -.02 | -.29 | -.002 | -.03 | .03 | .39 | .07 | .92 |
| c1*lsim | .07 | .67 | -.004 | -.05 | -.05 | -.54 | -.11 | -1.10 |
|  |  |  |  |  |  |  |  |  |

Table S2

Pretarget Word n Quantile Regression*. See main text for more details.*

|  | Intercept | | Preview difficulty (c1) | | Preview validity (c2) | |
| --- | --- | --- | --- | --- | --- | --- |
| Quantiles | Estimate (*b*) | *t*-value | Estimate (*b*) | *t*-value | Estimate (*b*) | *t*-value |
| .01-.1 | 46 | **5.53** | 21.5 | **3.38** | 8.2 | 1.10 |
| .11-.2 | 153 | **121.30** | -.5 | -.32 | -.5 | -.57 |
| .21-.3 | 173 | **148.73** | 1.0 | .68 | -1.3 | -1.69 |
| .31-.4 | 191 | **153.39** | 2.5 | 1.67 | -1.7 | -1.30 |
| .41-.5 | 207 | **145.77** | 2.5 | 1.33 | -2.2 | **-2.35** |
| .51-.6 | 225 | **158.64** | 2.0 | 1.21 | -1.3 | -1.28 |
| .61-.7 | 243 | **160.70** | 1.5 | .84 | -1.8 | -1.66 |
| .71-.8 | 264 | **141.01** | .5 | .23 | -1.2 | -.84 |
| .81-.9 | 296 | **103.84** | .0 | .00 | -.7 | -.31 |
| .91-1 | 359 | **75.29** | -.5 | -.08 | -2.5 | -.85 |

Table S3

Target Word n+1 Quantile Regression*. See main text for more details.*

|  | Intercept | | Preview difficulty (c1) | | Preview validity (c2) | |
| --- | --- | --- | --- | --- | --- | --- |
| Quantiles | Estimate (*b*) | *t*-value | Estimate (*b*) | *t*-value | Estimate (*b*) | *t*-value |
| .01-.1 | 105 | **13.14** | 14 | 1.56 | 0 | .00 |
| .11-.2 | 169 | **103.21** | 5 | **2.10** | -2 | -1.72 |
| .21-.3 | 186 | **123.37** | 6 | **2.80** | -4 | **-4.25** |
| .31-.4 | 204 | **139.59** | 8 | **4.35** | -6 | **-6.04** |
| .41-.5 | 221 | **133.05** | 9 | **3.82** | -7 | **-6.18** |
| .51-.6 | 238 | **123.03** | 10 | **3.93** | -8 | **-6.65** |
| .61-.7 | 259 | **118.47** | 16 | **5.38** | -11 | **-7.86** |
| .71-.8 | 283 | **114.94** | 17 | **5.03** | -13 | **-8.66** |
| .81-.9 | 315 | **112.87** | 14 | **3.69** | -17 | **-10.07** |
| .91-1 | 363 | **77.17** | 18 | **2.99** | -21 | **-6.45** |
